# Supplementary material for: How do substituent groups in the 5-position of 1,3-benzenedicarboxylate affect the construction of supramolecular frameworks?
Source: Royal Society of Chemistry journal article supplement (doi:10.1039/c005322h), 2010-01-01
Supplement: c005322h.pdf [file c005322h.pdf]

## Electronic Supplementary Information (ESI)

**How do substituent groups in the 5-position of  
1,3-benzenedicarboxylate affect the construction of  
supramolecular frameworks? †**

**Dong Liu,<sup>a</sup> Hong-Xi Li,<sup>a</sup> Lei-Lei Liu,<sup>a</sup> He-Ming Wang,<sup>a</sup> Ni-Ya Li,<sup>a</sup> Zhi-Gang Ren,<sup>a</sup> and  
Jian-Ping Lang<sup>\*a,b</sup>**

<sup>a</sup> *College of Chemistry, Chemical Engineering and Materials Science, Suzhou University, Suzhou  
215123, People's Republic of China*

<sup>b</sup> *State Key Laboratory of Organometallic Chemistry, Shanghai Institute of Organic Chemistry,  
Chinese Academy of Sciences, Shanghai 200032, People's Republic of China*

## Table of Contents

|                                                                                                                                                                                                                                                                                                                                                                                                                                                                                   |    |
|-----------------------------------------------------------------------------------------------------------------------------------------------------------------------------------------------------------------------------------------------------------------------------------------------------------------------------------------------------------------------------------------------------------------------------------------------------------------------------------|----|
| <b>Fig. S1</b> Powder XRD patterns of (a) $[\text{Zn}(\text{OH}_2)(5\text{-HO-1,3-BDC})(1,4\text{-bpeb})]_n$ ( <b>1</b> ); (b) $[\text{Zn}(\text{HBTC})(1,4\text{-bpeb})]_n$ ( <b>2</b> ); (c) $\{[\text{Zn}(5\text{-NO}_2\text{-1,3-BDC})(1,4\text{-bpeb})]\cdot 2(\text{H}_2\text{O})_{0.5}\}_n$ ( <b>3</b> ); (d) $[\text{Zn}(5\text{-Me-1,3-BDC})(1,4\text{-bpeb})]_n$ ( <b>4</b> ). Black: simulated from single crystal analysis and experimental; Red: as synthesized..... | S3 |
| <b>Fig. S2</b> (a) The O1–H2W···N2 H-bonding interaction in <b>1</b> . (b) The O1–H1W···O5 H-bonding interaction in <b>1</b> . (c) The O6–H6A···O3 H-bonding interactions in <b>1</b> .....                                                                                                                                                                                                                                                                                       | S4 |
| <b>Fig. S3</b> The O5–H5A···N2 H-bonding interaction in <b>2</b> .....                                                                                                                                                                                                                                                                                                                                                                                                            | S5 |
| <b>Fig. S4</b> The O7–H1W···O5 and O8–H2W···O6 H-bonding interactions in <b>3</b> .....                                                                                                                                                                                                                                                                                                                                                                                           | S5 |
| <b>Fig. S5</b> Emission spectra of <b>1–4</b> in the solid state at ambient temperature.....                                                                                                                                                                                                                                                                                                                                                                                      | S6 |
| <b>Fig. S6</b> The TGA curves for <b>1</b> (black), <b>2</b> (red), <b>3</b> (blue) and <b>4</b> (purple).....                                                                                                                                                                                                                                                                                                                                                                    | S7 |

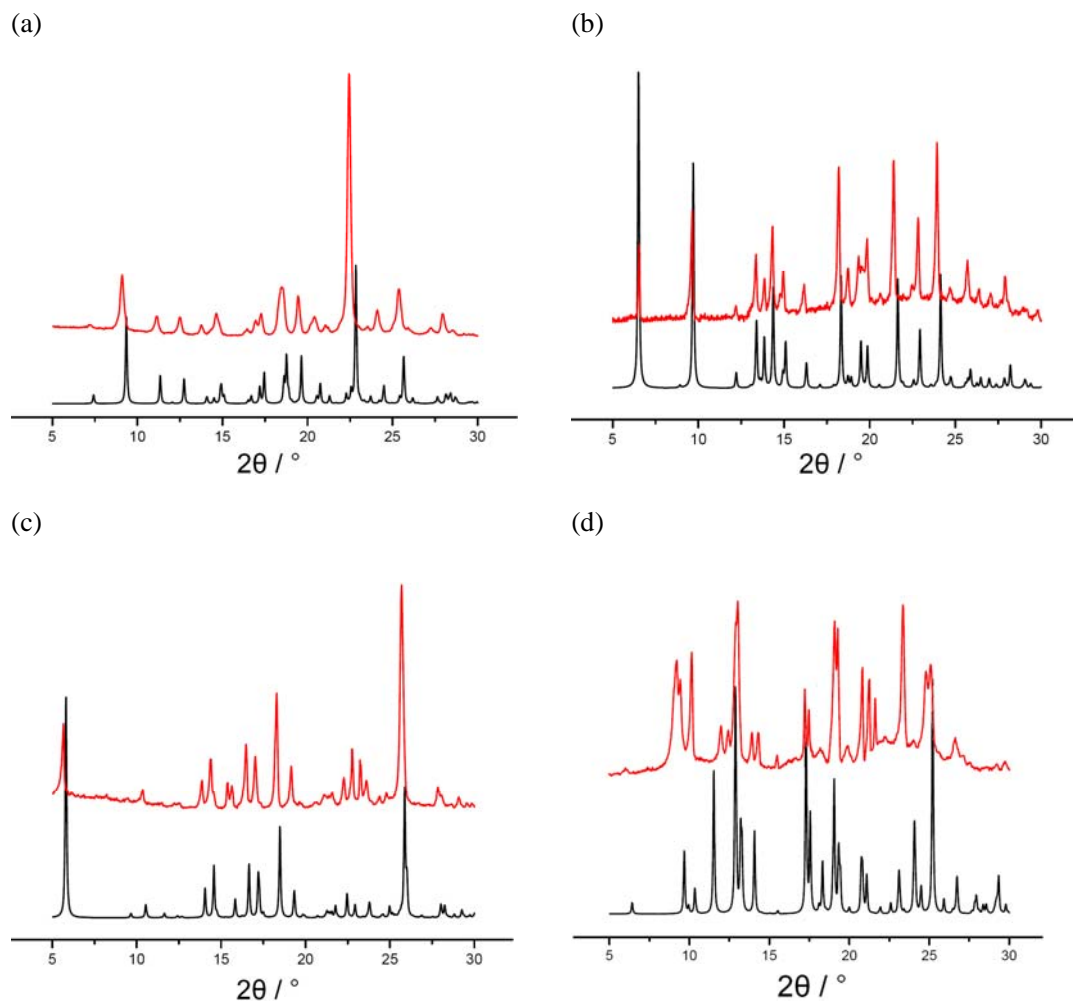

**Fig. S1** Powder XRD patterns of (a)  $[\text{Zn}(\text{OH}_2)(5\text{-HO-1,3-BDC})(1,4\text{-bpeb})]_n$  (**1**); (b)  $[\text{Zn}(\text{HBTC})(1,4\text{-bpeb})]_n$  (**2**); (c)  $\{[\text{Zn}(5\text{-NO}_2\text{-1,3-BDC})(1,4\text{-bpeb})] \cdot 2(\text{H}_2\text{O})_{0.5}\}_n$  (**3**); (d)  $[\text{Zn}(5\text{-Me-1,3-BDC})(1,4\text{-bpeb})]_n$  (**4**). Black: simulated from single crystal analysis and experimental; Red: as synthesized.

(a)

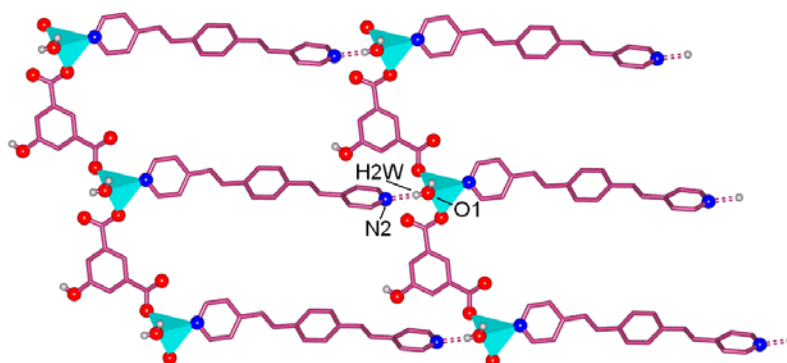

(b)

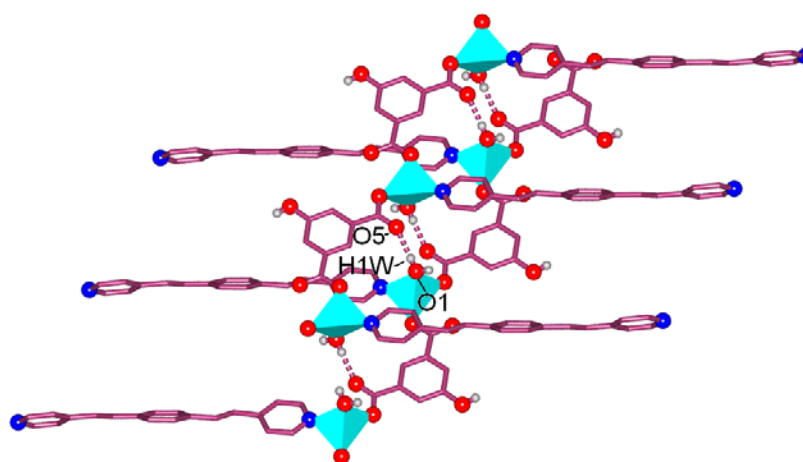

(c)

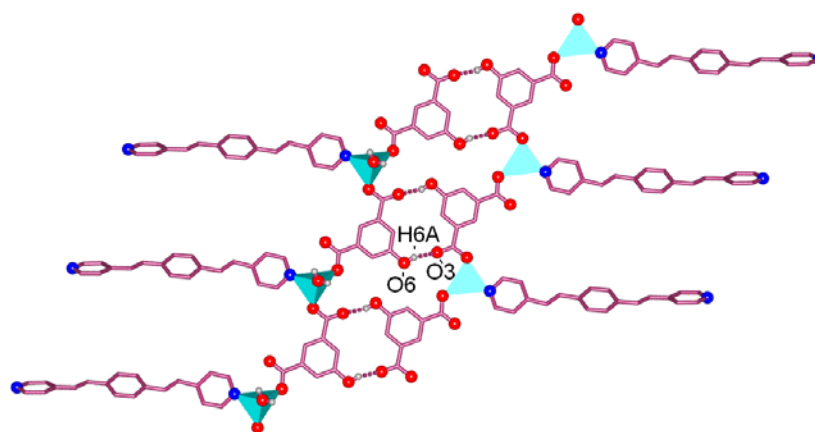

**Fig. S2** (a) The O1–H2W...N2 H-bonding interaction in **1**. (b) The O1–H1W...O5 H-bonding interaction in **1**. (c) The O6–H6A...O3 H-bonding interaction in **1**.

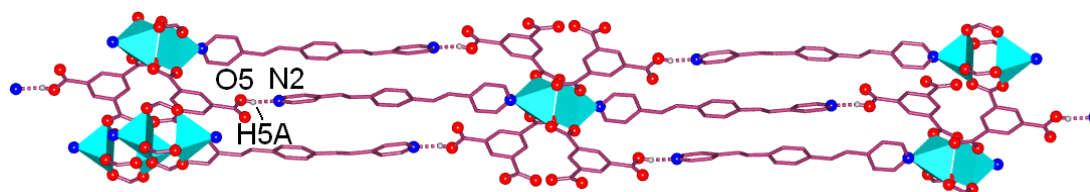

**Fig. S3** The O5–H5A...N2 H-bonding interaction in **2**.

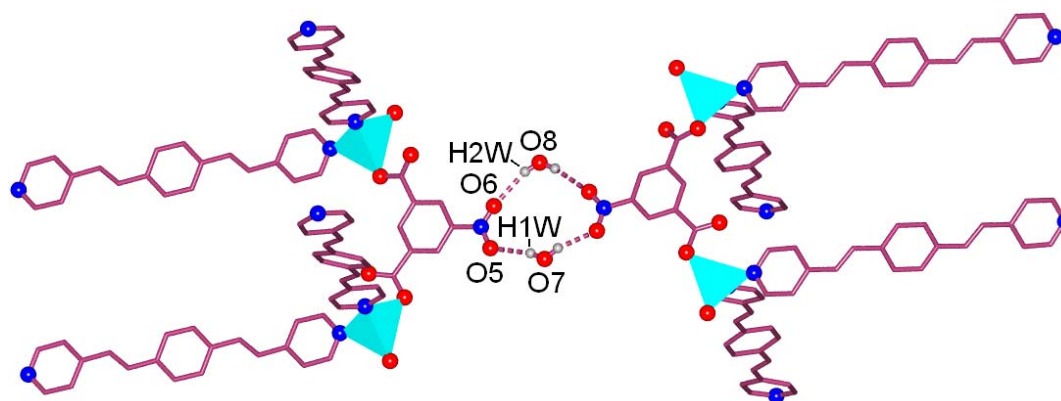

**Fig. S4** The O7–H1W...O5 and O8–H2W...O6 H-bonding interactions in **3**.

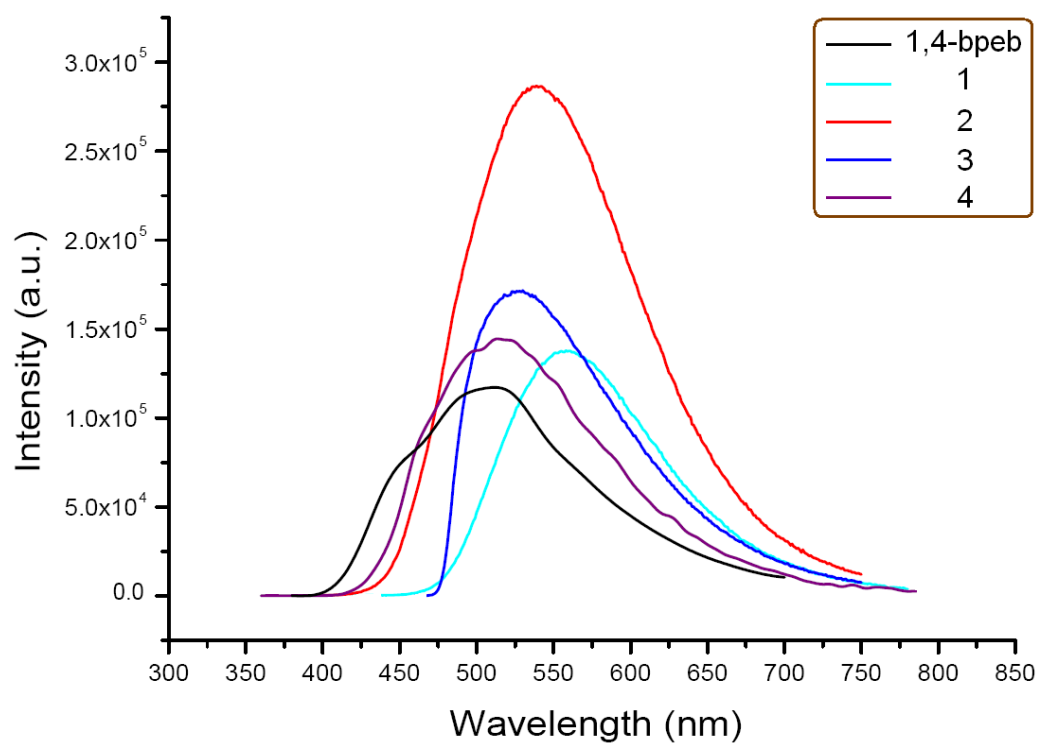

**Fig. S5** Emission spectra of **1–4** in the solid state at ambient temperature.

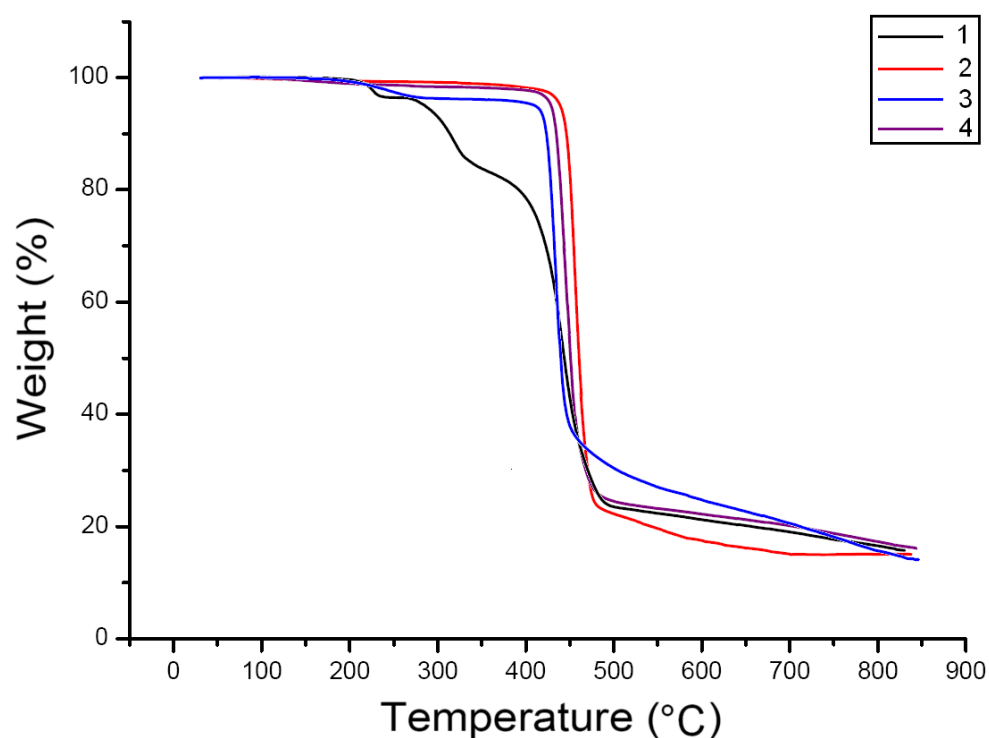

**Fig. S6** The TGA curves for **1** (black), **2** (red), **3** (blue) and **4** (purple).

The thermal properties of **1-4** were described as follows. The thermogravimetric analyses revealed that **1-4** were stable up to 202 °C (**1**), 415°C (**2**), 193°C (**3**), and 400 °C (**4**) (Fig. S5†). For **1** and **3**, the first weight loss of 3.56% from 202 to 258 °C (**1**) or 3.51% from 193 to 265 °C (**3**) corresponds roughly to the loss of one coordinated water molecule per formula unit in **1** (calculated 3.29%) or two one-half of the uncoordinated water molecules per formula unit in **3** (calculated 3.12%). The second weight loss of 81.30% from 258 to 820 °C (**1**) or 82.62% from 265 to 830 °C (**3**) approximately amounts to the loss of all 1,4-bpeb and 5-HO-1,3-BDC or 5-NO<sub>2</sub>-1,3-BDC ligands (calculated 81.85% for **1** and 82.77% for **3**). For **2** and **4**, only one weight loss of 85.38% from 415 to 820 °C (**2**) or 84.69% from 400 to 820 °C (**4**) amounts roughly to the loss of 1,4-bpeb and H<sub>3</sub>BTC or 5-Me-1,3-BDC ligands (calculated 85.41% for **2** and 84.58% for **4**). In all cases, the decomposition residue species, according to X-ray fluorescence analysis, was assumed to be ZnO (15.14% vs calculated 14.86% (**1**), 14.62% vs calculated 14.59% (**2**), 13.87% vs calculated 14.11% (**3**), and 15.31% vs calculated 15.42% (**4**)).
